# Supplementary material
Source: HighWire-hosted journal article supplement (http://www.cmaj.ca/highwire/filestream/68942/field_highwire_adjunct_files/0/091362-case-1-at.pdf)
Supplement: 091362-case-1-at.pdf [file 091362-case-1-at.pdf]

**Appendix 1 (as supplied by authors): Severe ergotism after concomitant use of ergotamine and antiretroviral therapy for HIV infection: Review of the case reports**

| References                                                              | Case Reports                                                                                                                          | Ergotamine dose / HIV therapy                                                                       | Therapy of ergotism (besides stopping ergotamine)                                                |
|-------------------------------------------------------------------------|---------------------------------------------------------------------------------------------------------------------------------------|-----------------------------------------------------------------------------------------------------|--------------------------------------------------------------------------------------------------|
| <b>Pardo Rey C et al. Clin infect dis 2003 [1]</b>                      | 34 year old woman irreversible coma                                                                                                   | ergotamine (cumulative dose 3 mg) ritonavir                                                         | nimodipine, alprostadil, ritonavir discontinued <sup>2</sup>                                     |
| <b>Spiegel M Neurology 2001 [2]</b>                                     | 37 year old woman expressive aphasia and a right-sided central peroneal nerve paresis 90 days after hospital admission                | ergotamine (cumulative dose 10 mg over 4 days), ritonavir                                           | nitroglycerin i.v. <sup>2</sup>                                                                  |
| <b>Baldwin ZK J Vasc Surg 2003 [3]</b>                                  | 36 year old man claudication, forefoot cyanosis                                                                                       | single dose of ergotamine (2 mg), two protease inhibitors and one nucleoside analog                 | nifedipine po, heparine <sup>1</sup>                                                             |
| <b>Vila A et al [4] Scand J Infect Dis 2001</b>                         | 36 year old man severe ergotism lower limbs                                                                                           | ergotamine low-dose, ritonavir, amprenavir, lamivudine, stavudine                                   | ritonavir discontinued heparine, intraarterial prostaglandin, urokinase, nifedipine <sup>1</sup> |
| <b>Mortier E et al Am J Med 2001 [5]</b>                                | 40 year old woman pain and cyanosis in all toes<br>recurrence of symptoms after being exposed to ergotamine again, eight months later | single dose of ergotamine (2mg) plus 200 mg caffeine, nelfinavir                                    | no specific treatment <sup>1</sup>                                                               |
| <b>Blanche P [6] Postgrad Med J 1999</b>                                | 31 year old man pain and cyanosis in both feet                                                                                        | single dose of ergotamine (2 mg), ritonavir                                                         | pentoxifyllin, nadroparin, ritonavir discontinued, nicardipin, prostacyclin <sup>1</sup>         |
| <b>Rosenthal E et al JAMA 1999 [7]</b>                                  | 30 year old man claudication of left lower limb                                                                                       | ergotamine 1 mg for 6 days, caffeine indinavir                                                      | heparin and buflomedil, indinavir discontinued <sup>1</sup>                                      |
| <b>Liaudet L BMJ 1999 [8]</b>                                           | 28 year old woman pale and pulsless extremities transmetatarsal amputation                                                            | 3 mg ergotamine for 5 days, ritonavir, fluoxetine                                                   | nitroprusside, heparine, nifedipine, iloprost <sup>2</sup>                                       |
| <b>Montero A Ann Int Med 1999 [9]</b>                                   | 40 year old woman leg pain and severe ischemia                                                                                        | single dose of ergotamine 1 mg, ritonavir, caffeine 100 mg                                          | ritonavir stopped, nifedipine+dextrane <sup>1</sup> , nitroprusside <sup>1</sup>                 |
| <b>Caballero FJ et al. Antimicrob agents and chemotherapy 1997 [10]</b> | 63 year old man pain and cyanosis in both arms                                                                                        | ergotamine 1-2 mg / d over 5 years, ritonavir for 10 days                                           | prostaglandin E1 and nadroparin, ritonavir discontinued <sup>1</sup>                             |
| <b>Tri G Phan [11] MJA Vol 171, 1 Nov 1999</b>                          | 31 year old man peripheral neuritis of lower limbs                                                                                    | 4 doses of ergotamine 1mg plus caffeine (over 10 days) ritonavir, nelfinavir, stavudine, lamivudine | regular medication stopped, nifedipine, heparin, prostaglandin <sup>1</sup>                      |
| treatment successful <sup>1</sup> treatment not successful <sup>2</sup> |                                                                                                                                       |                                                                                                     |                                                                                                  |

**References**

1. Pardo Rey C, Yebra M, Borrallo M et al. Irreversible Coma, Ergotamine and Ritonavir. Clinical Infectious Diseases 2003;37:e72-3
2. Spiegel M, Schmidauer C, Kampfl A et al. Cerebral ergotism under treatment with

- ergotamine and ritonavir. *Neurology* 2001;57;743-744
3. Baldwin ZK, Ceraldi CC. Ergotism associated with HIV antiviral protease inhibitor therapy. *J Vasc Surg* 2003;37(3); 676-8
  4. Vila A, Mykietiuik A, Bonvehi P et al. Clinical ergotism induced by ritonavir. *Scand Infect Dis* 2001;33(10):788-9
  5. Mortier E, Pouchot J, Vinceneux P et al. Ergotism related to interaction between nelfenavir and ergotamine. *The American Journal of Medicine* 2001;110:594
  6. Blanche P, Rigolet A, Gombert B, Ginsburg C et al. Ergotism related to a single dose of ergotamine tartrate in an AIDS patient treated with ritonavir
  7. Rosenthal E, Sala F, Chichmanian RM et al. Ergotism related to concurrent administration of ergotamine tartrate and indinavir. *JAMA* 1999;281(11):987
  8. Liaudet L, Buclin T, Jaccard C et al. Severe ergotism associated with interaction between ritonavir and ergotamine. *BMJ* 1999;318:771
  9. Montero A, Giovannoni AG, Tvrde PL et al. Leg ischemia in a patient receiving ritonavir and ergotamine. *Annals of Internal Medicine* 1999;130:329-330
  10. Caballero-Granado FJ, Viciana P, Cordero E et al. Ergotism related to concurrent administration of ergotamine tartrate and ritonavir in an AIDS patient. *Antimicrobial Agents and Chemotherapy*. 1997;1207
  11. Tri G Phan, Dora Agalotis, Geoffrey White et al. Ischaemic peripheral neuritis secondary to ergotism associated with ritonavir therapy. *MJA* 1999; 171; p. 502-504
